# Supplementary material for: Influence of Combinations of Lipophilic and Phosphate Backbone Modifications on Cellular Uptake of Modified Oligonucleotides
Source: Preprints.org preprint supplement (doi:10.20944/preprints202312.0660.v1), 2023-12-11
Supplement: Supplementary file 1 [file supplementary]

# SUPPLEMENTARY MATERIAL S1

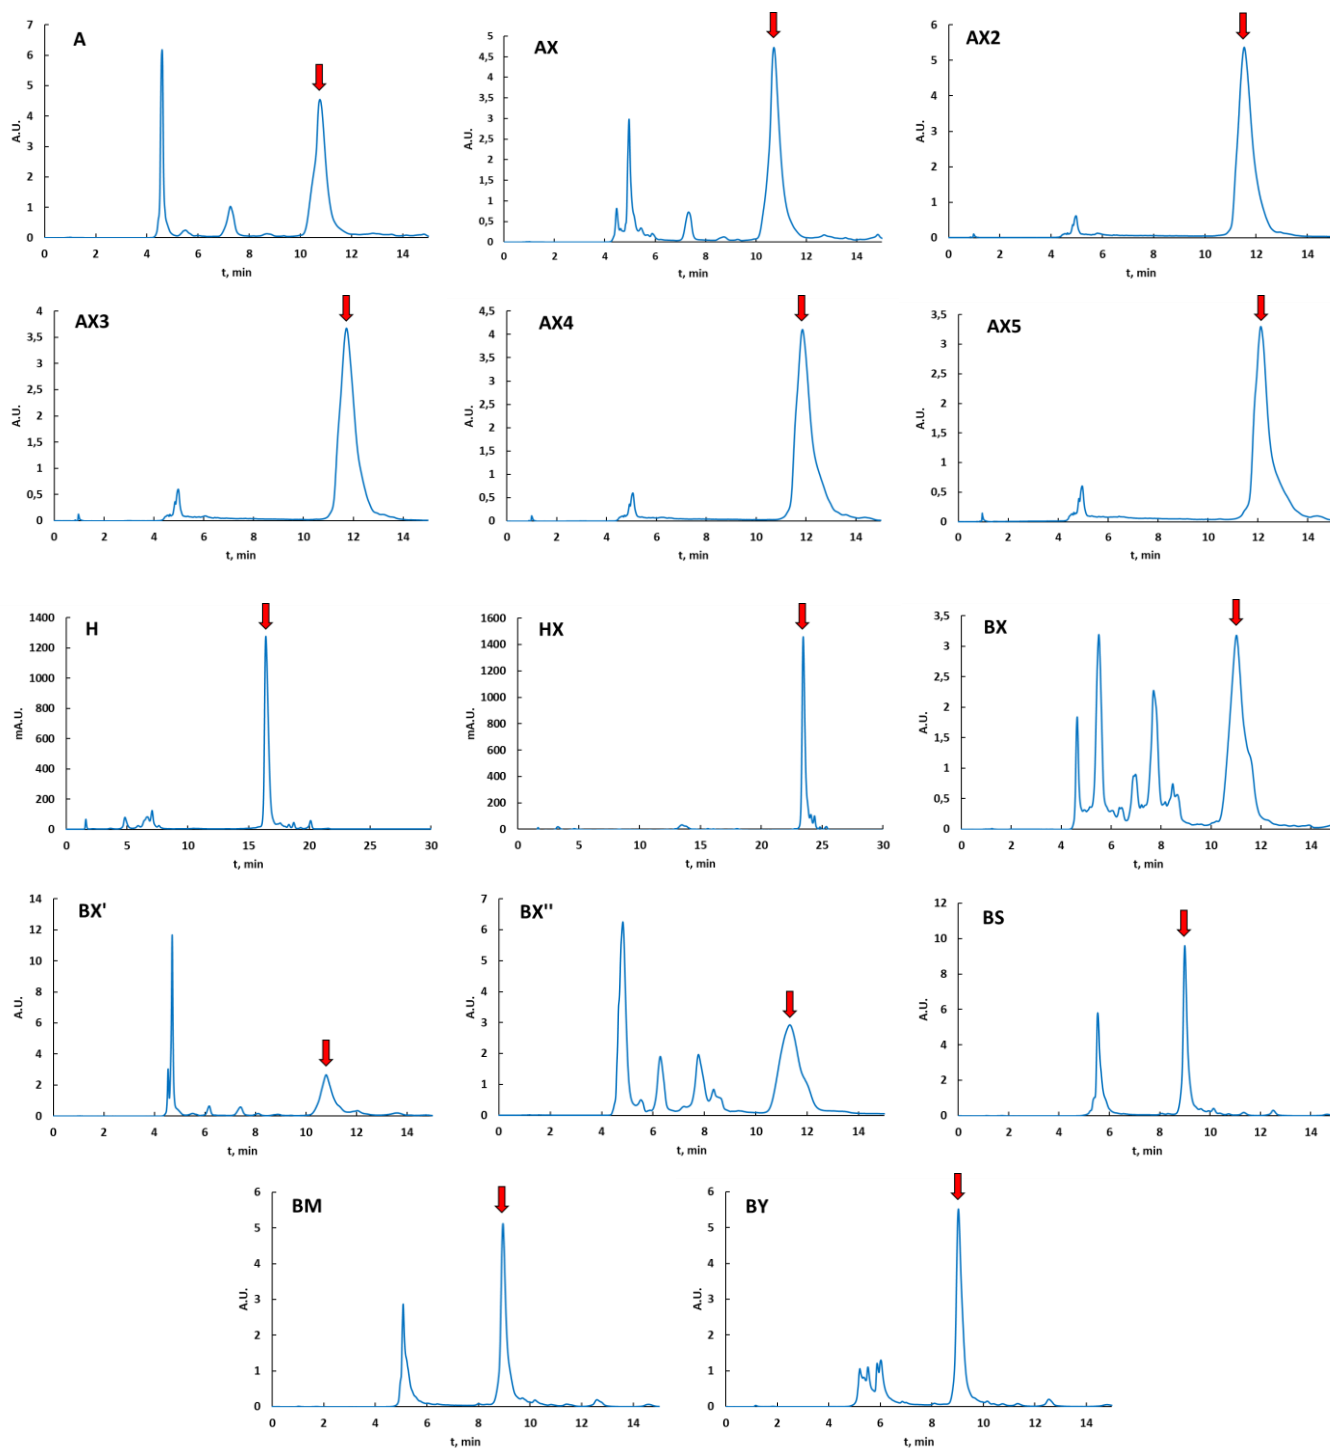

**Figure S1.** Analytical RP HPCL profiles of reaction mixture (A, AX, H, HX, B, BX, BX', BX'', BS, BM, BY) and purified product (AX2, AX3, AX4, AX5) of synthesis of corresponding modified oligonucleotides. Red arrow shows peak that was collected and identified as desired product. Oligonucleotides H, HX containing cholesterol moieties were analyzed using preparative 4.6×150 mm column with C4-tailed immobile phase in the gradient from 0 to 90% of acetonitrile in 0.02 M tetraethylammonium acetate (TEAAc) in 30 minutes. The other oligonucleotides were analyzed as described in Materials and Methods section.

SUPPLEMENTARY MATERIAL S2

A 5'-[FAM]CTGACTATGAAGTAT\*T-3'

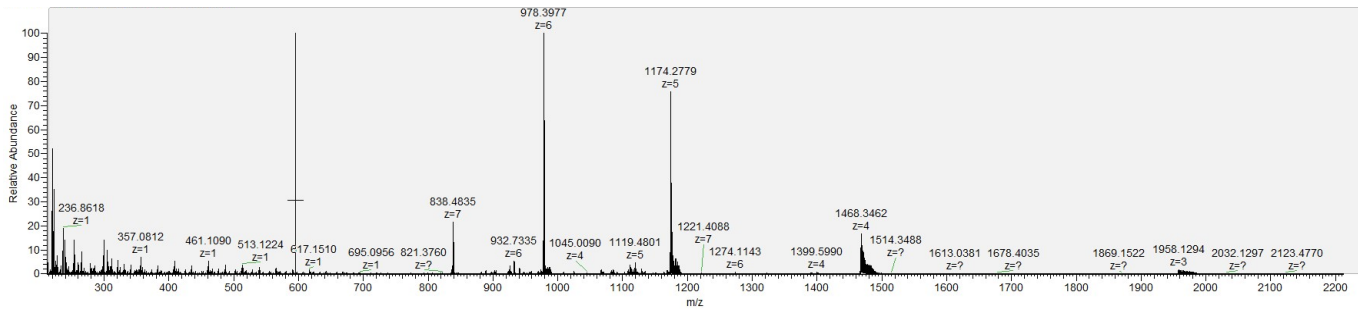

AX 5'-[FAM]\*C\*XTGACTATGAAGTAT\*T-3'

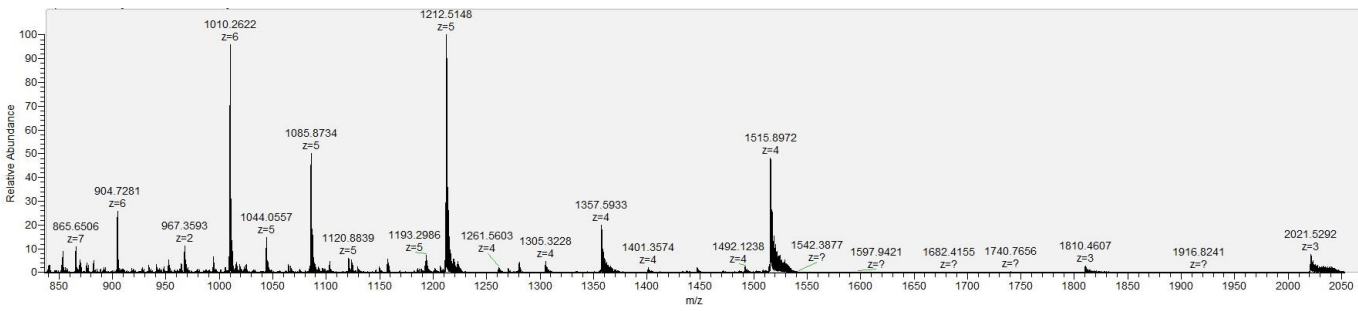

AX2 5'-[FAM]\*C\*XT\*G\*ACTATGAAGTAT\*T-3'

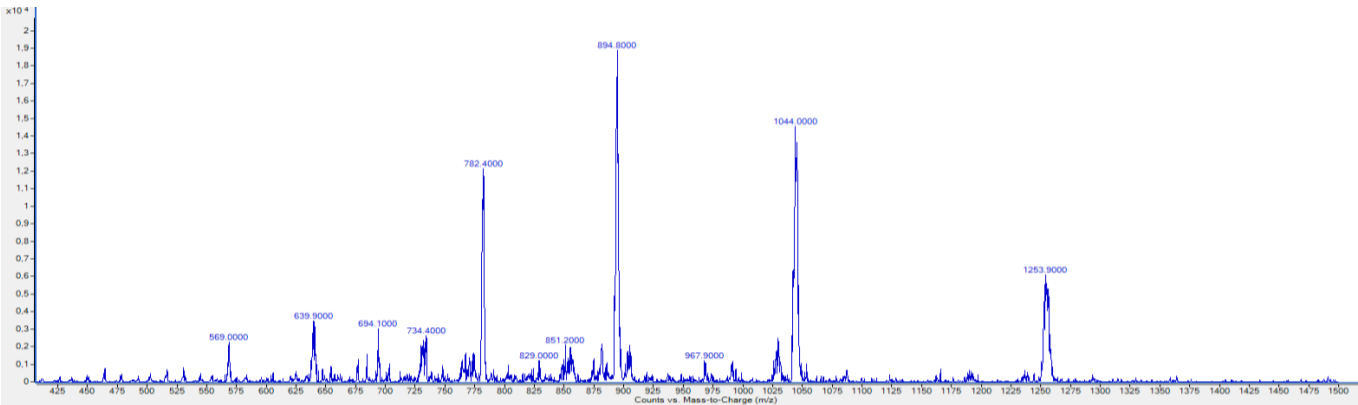

AX3 5'-[FAM]\*C\*XT\*G\*XA\*C\*XTATGAAGTAT\*T-3'

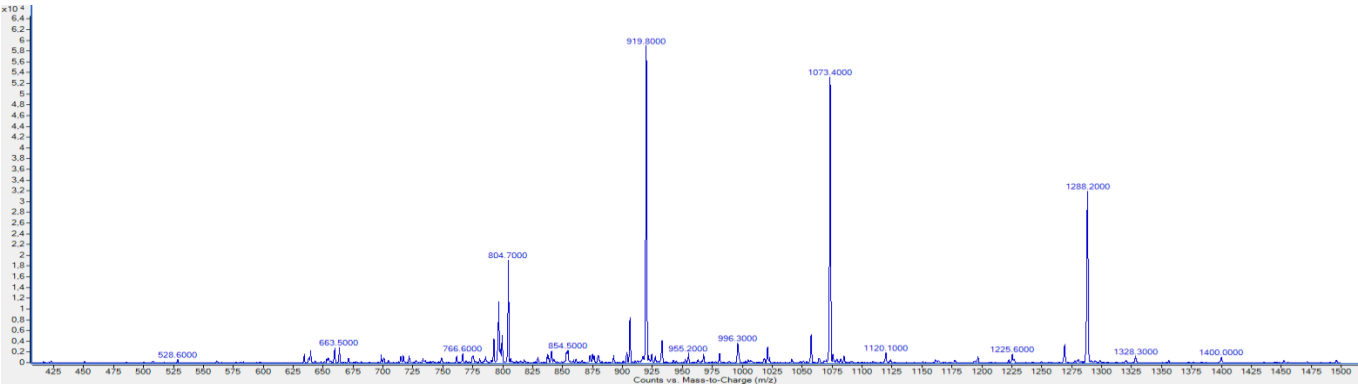

# SUPPLEMENTARY MATERIAL S2 (Continued)

AX4 5'-[FAM]xCxTxGxAxCxTxATGAAGTAT\*T-3'

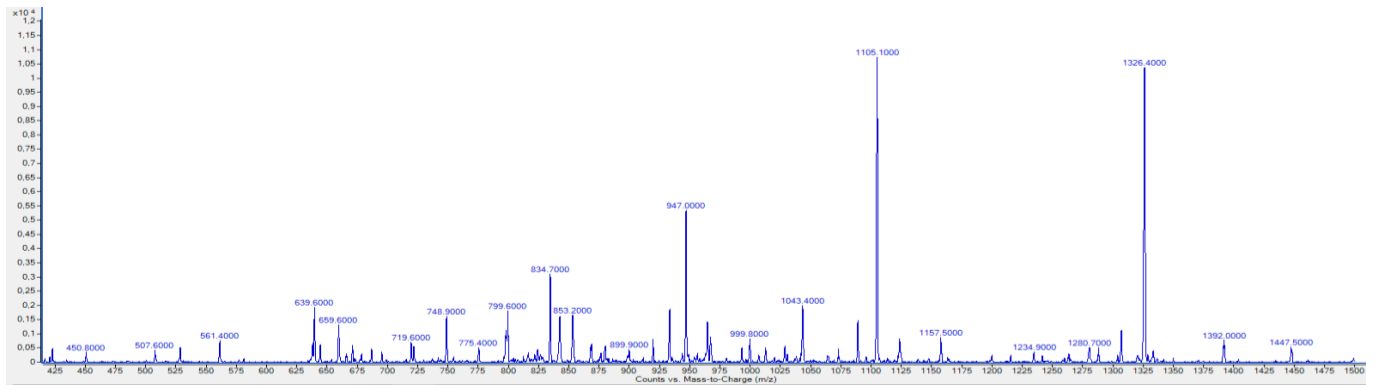

AX5 5'-[FAM]xCxTxGxAxCxTxATGxAAGTAT\*T-3'

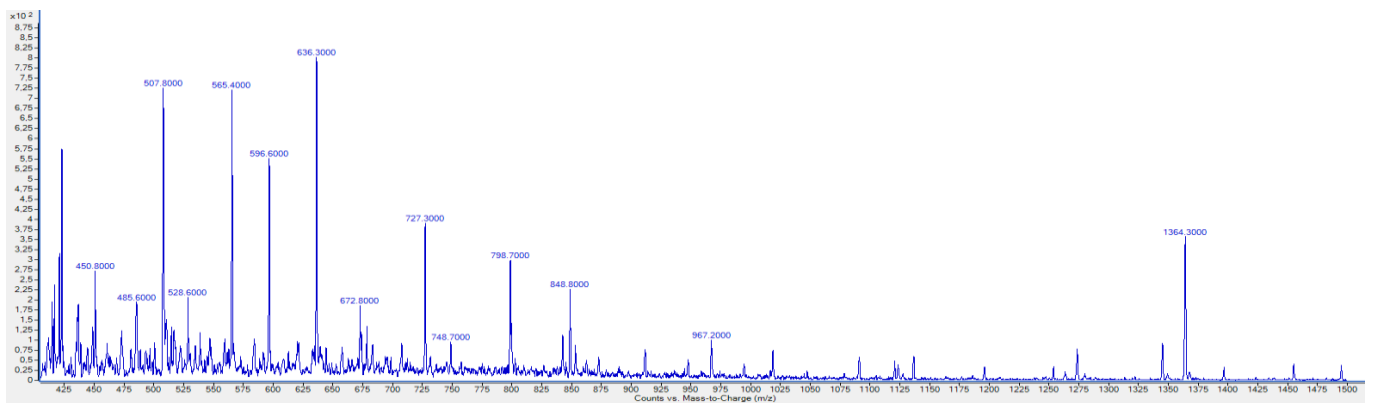

H 5'-[FAM]CTGACTATGAAGTATT[Chol]-3'

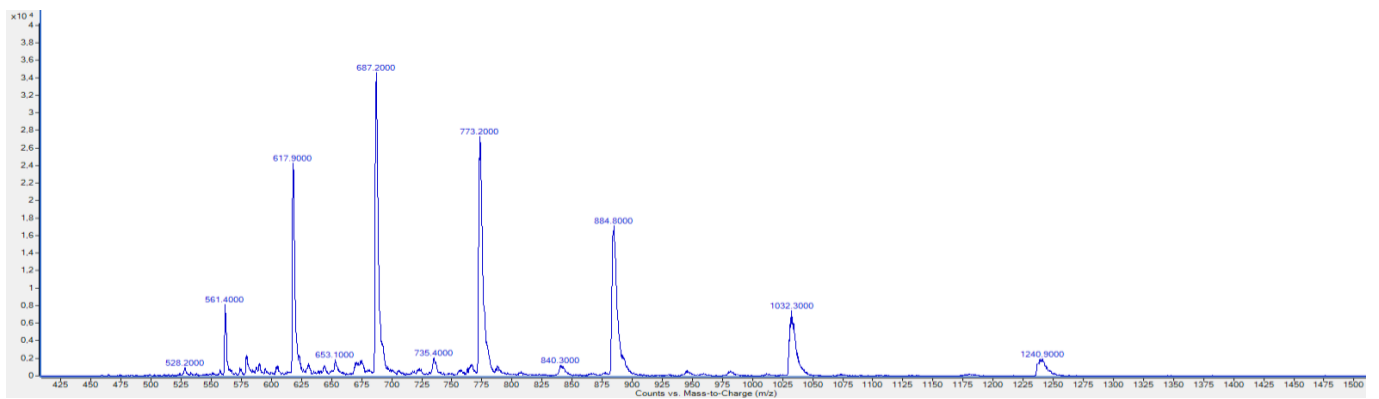

HX 5'-[FAM]xCxTGACTATGAAGTATT[Chol]-3'

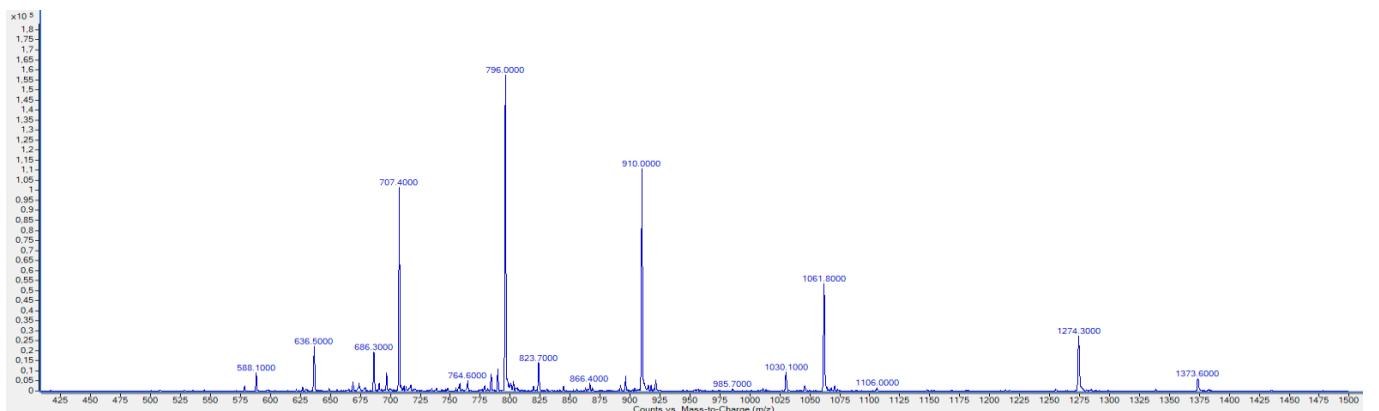

# SUPPLEMENTARY MATERIAL S2 (Continued)

B 5'-[FAM]AGTCTCGACTTGCTAT\*T-3'

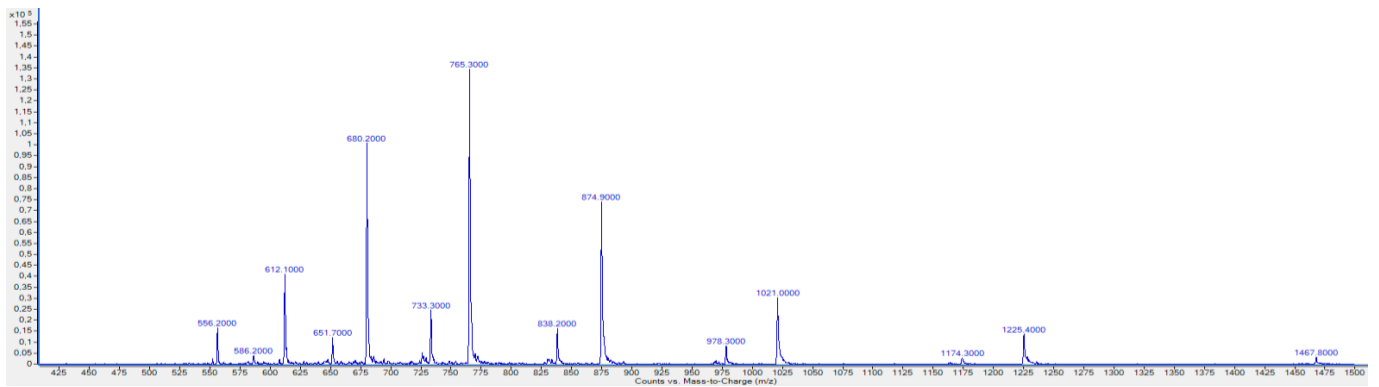

BX 5'-[FAM]\*A\*GTCTCGACTTGCTAT\*T-3'

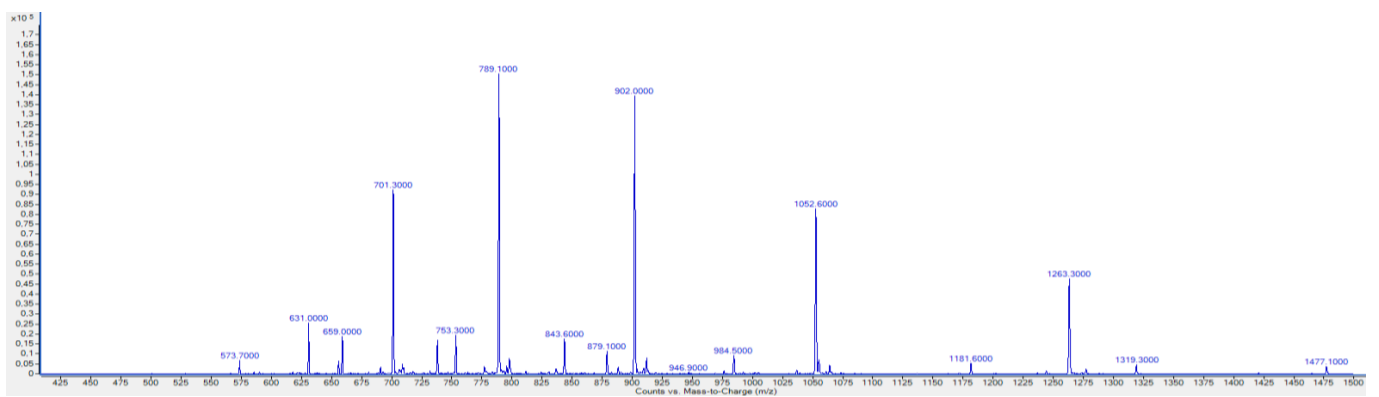

BX' 5'-[FAM]AGTCTCG\*A\*CTTGCTAT\*T-3'

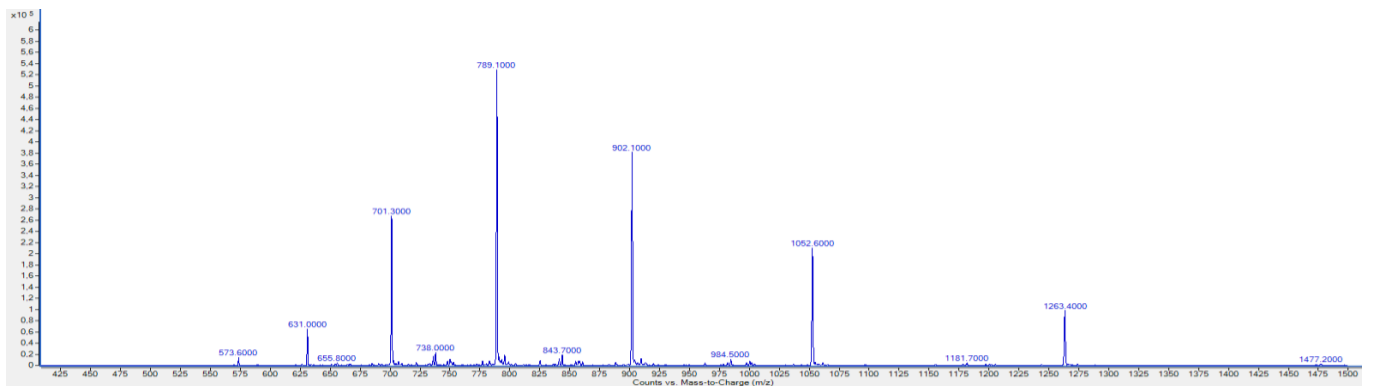

BX'' 5'-[FAM]AGTCTCGACTTGCT\*A\*T\*T-3'

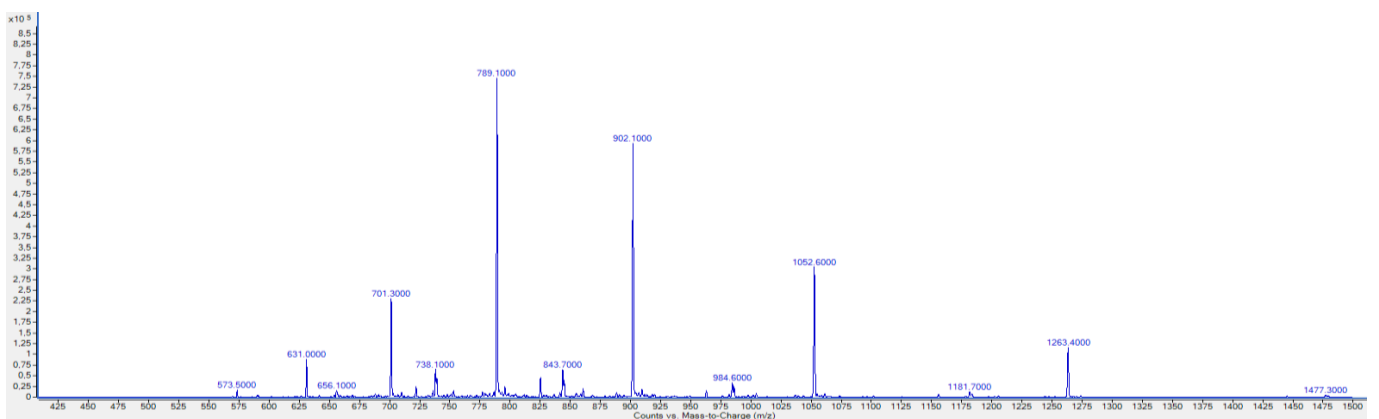

# SUPPLEMENTARY MATERIAL S2 (Continued)

BS 5'-[FAM]**S**A**S**GTCTCGACTTGCTAT\***T**-3'

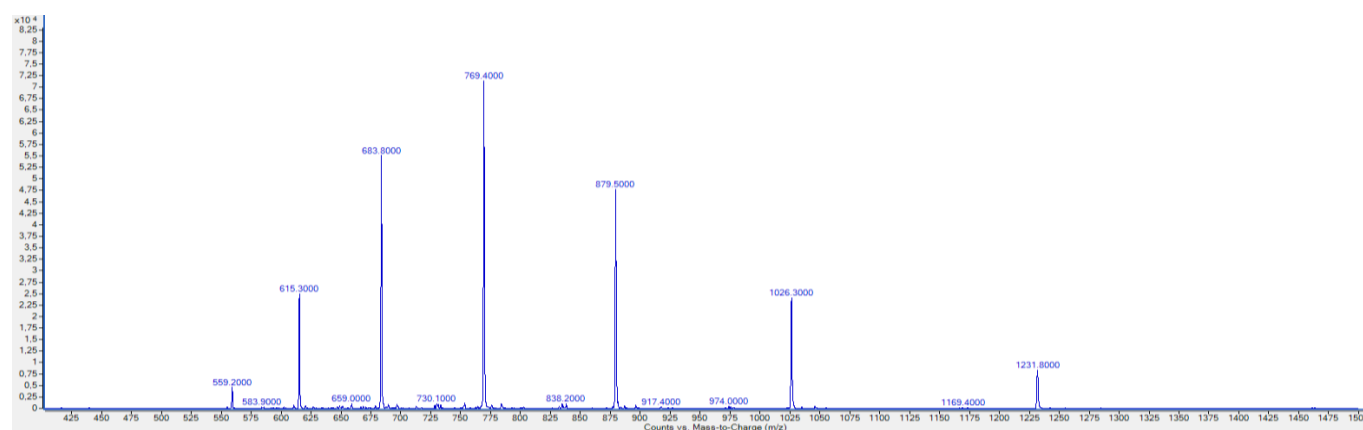

BY 5'-[FAM]**Y**A**Y**GTCTCGACTTGCTAT\***T**-3'

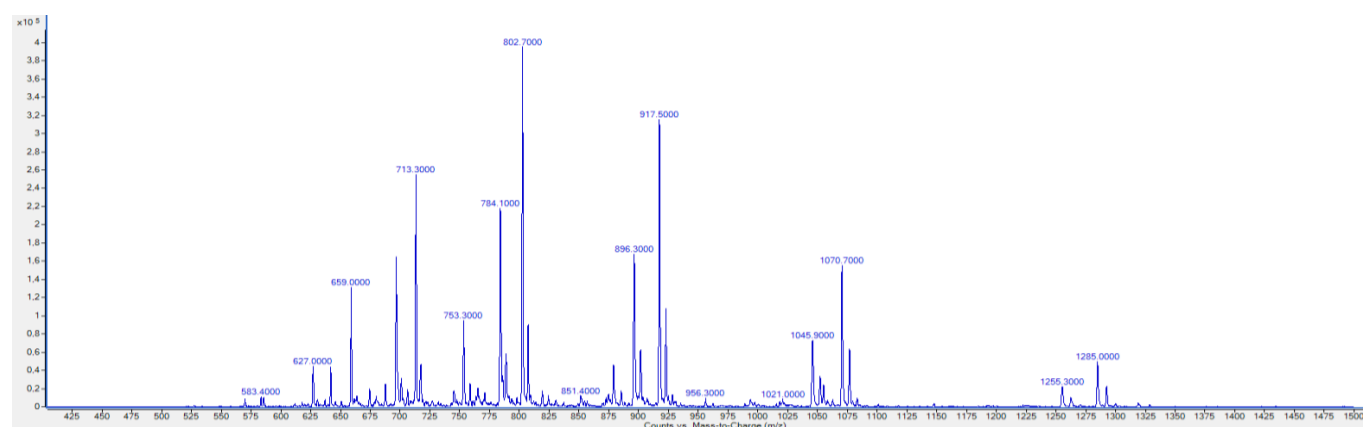

BM 5'-[FAM]**M**A**M**GTCTCGACTTGCTAT\***T**-3'

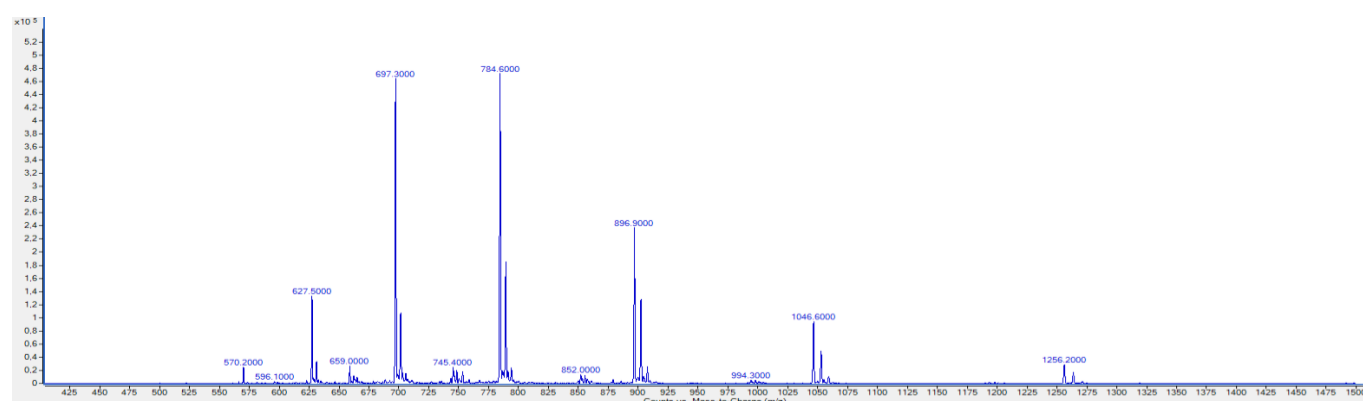

**Figure S2.** Undeconvoluted results of ESI mass spectrometry in negative ion registration mode of corresponding modified oligonucleotides.

# SUPPLEMENTARY MATERIAL S3

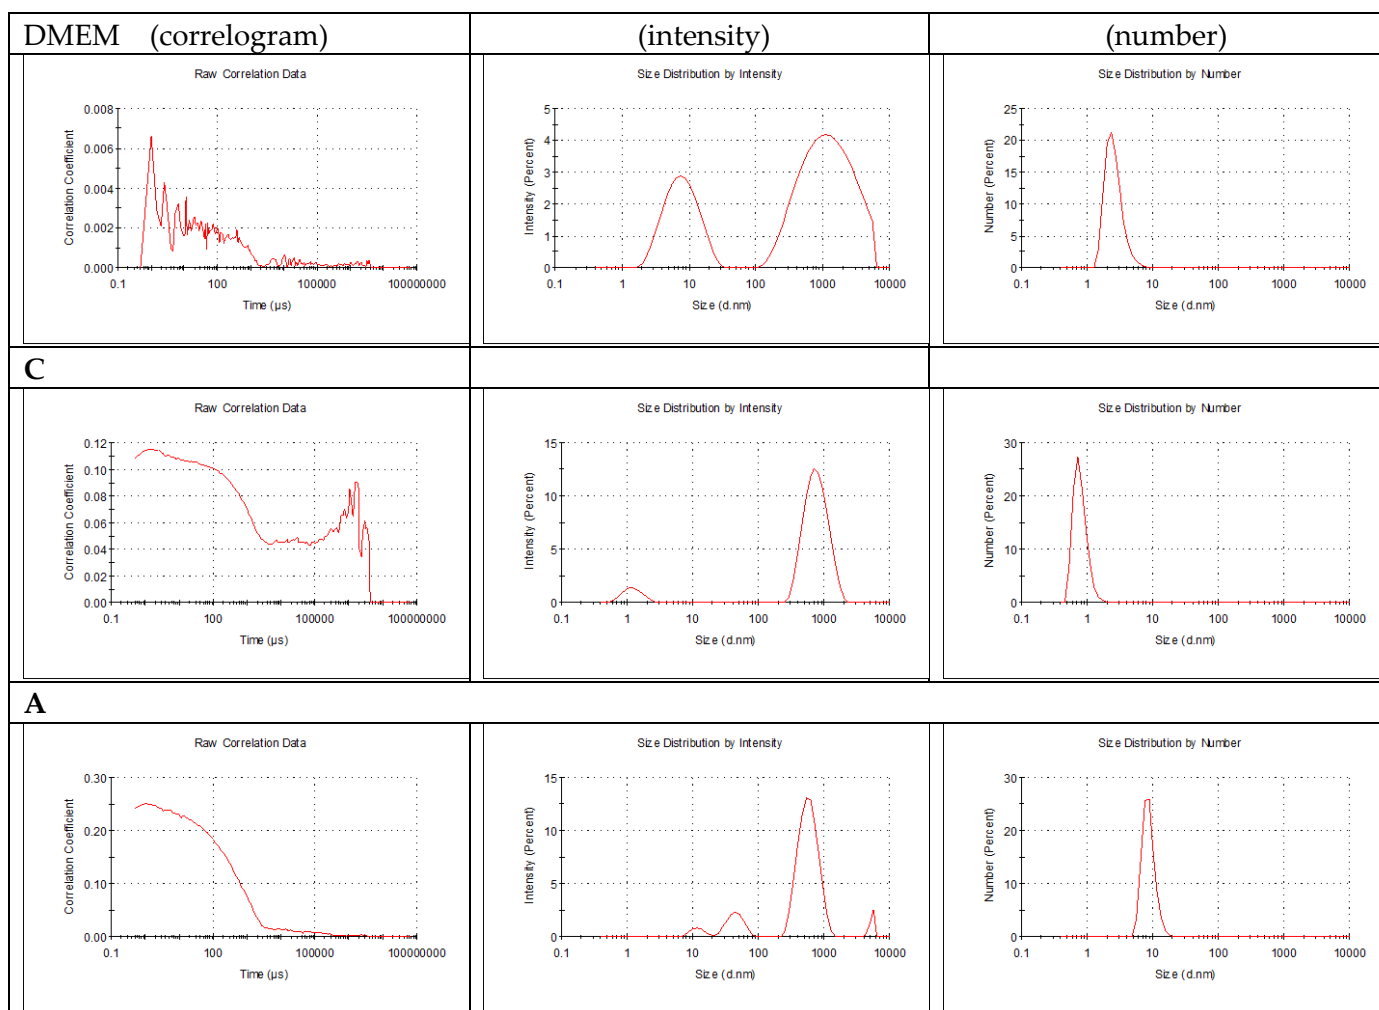

**Figure S3.** Correlogram, intensity and number graphs of DLS experiment for the controls (DMEM medium, unmodified oligonucleotide C) and oligonucleotide A. Measurements conditions: DMEM medium, 10 measurements in 2 h, 5 $\mu$ M concentration of oligonucleotide.

# SUPPLEMENTARY MATERIAL S4

**Table S1.** Melting temperatures for duplexes of studied oligonucleotides with complementary unmodified oligonucleotides M, 5'-AAT ACT TCA TAG TCA G-3' and N, 5'- AAT AGC AAG TCG AGA CT -3'; F – fluoresceine labeled oligonucleotide with the sequence of 5'-CTG ACT ATG AAG TAT T-3'. Thermal denaturation experiments were carried out using a UV detector on a UV-1800 UV spectrophotometer (Shimadzu, Japan) equipped with a Peltier block. Equimolar amounts (4  $\mu$ M, 50  $\mu$ L of each strand) of complementary oligonucleotides were used. Melting curves were recorded at 260 nm within a temperature range from 25°C to 85°C with a heating/cooling rate of 0.2°C/min, in a x1 PBS buffer.

| Code   | T <sub>m</sub> , °C | $\Delta$ T <sub>m</sub> , °C |
|--------|---------------------|------------------------------|
| F/M    | 50.3                | -                            |
| A/M    | 49.8                | -0.5                         |
| AX/M   | 46.1                | -4.2                         |
| AX2/M  | 43.5                | -6.8                         |
| AX3/M  | 39.4                | -10.9                        |
| AX4/M  | 38.5                | -11.8                        |
| AX5/M  | 38.6                | -11.7                        |
| H/M    | 53.0                | +2.7                         |
| HX/M   | 50.9                | +0.6                         |
| C/N    | 60.5                | -                            |
| B/N    | 61.2                | +0.7                         |
| BX/N   | 58.5                | -2.0                         |
| BX'/N  | 59.5                | -1.0                         |
| BX''/N | 59.3                | -1.2                         |
| BS/N   | 60.7                | +0.2                         |
| BM/N   | 60.1                | -0.4                         |
| BY/N   | 59.1                | -1.4                         |
